# Supplementary material for: Efficient heterogeneous functionalized polymer ionic liquid catalyst for the synthesis of ethylene carbonate via the coupling of carbon dioxide with ethylene oxide
Source: Royal Society of Chemistry journal article supplement (doi:10.1039/c4ra02689f), 2014-01-01
Supplement: c4ra02689f1.pdf [file c4ra02689f1.pdf]

# **Efficient Heterogeneous Polymer Ionic Liquid Catalyst for the Synthesis of Ethylene Carbonate via the Coupling of Carbon Dioxide with Ethylene Oxide**

*Bo Zhang,<sup>a</sup> Lei Zhang,<sup>a</sup> Qinghai Wu,<sup>b</sup> Quanxi Wang,<sup>b</sup> Baoan Song,<sup>a</sup> Wenjun Wu,<sup>c</sup>*

*Bin Lu<sup>b</sup> and Tianrui Ren<sup>\*b</sup>*

*<sup>a</sup> State Key Laboratory Breeding Base of Green Pesticide and Agricultural Bioengineering/  
Key Laboratory of Green Pesticide and Agricultural Bioengineering, Ministry of Education,  
Guizhou University, Guiyang, 550025, P. R. China*

*<sup>b</sup>The Key Laboratory of Resource Chemistry of Ministry of Education, The development  
centre of plant germplasm resources, College of Life and Environmental science,  
Shanghai Normal University, 100 Guilin Road, Shanghai, 200234, P. R. China*

*<sup>c</sup>School of Chemistry and Molecular Engineering, East China University of Science and  
Technology, 130 Meilong Road, Shanghai, 200237, P. R. China*

## Supporting information

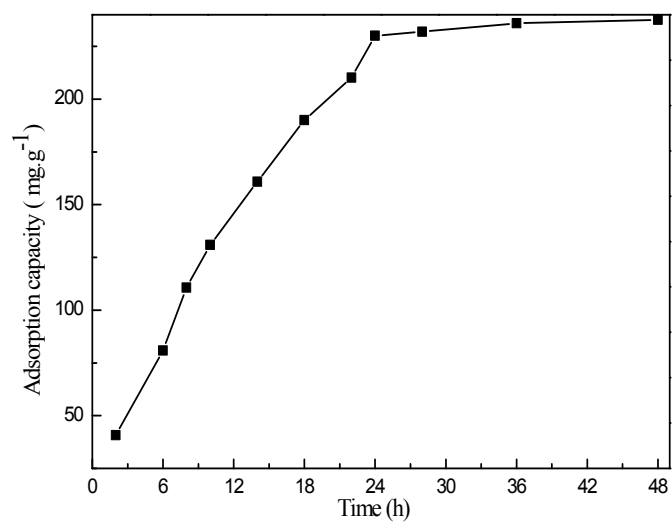

Fig. S1 Equilibrium adsorption of functionalize PIL on molecular sieve

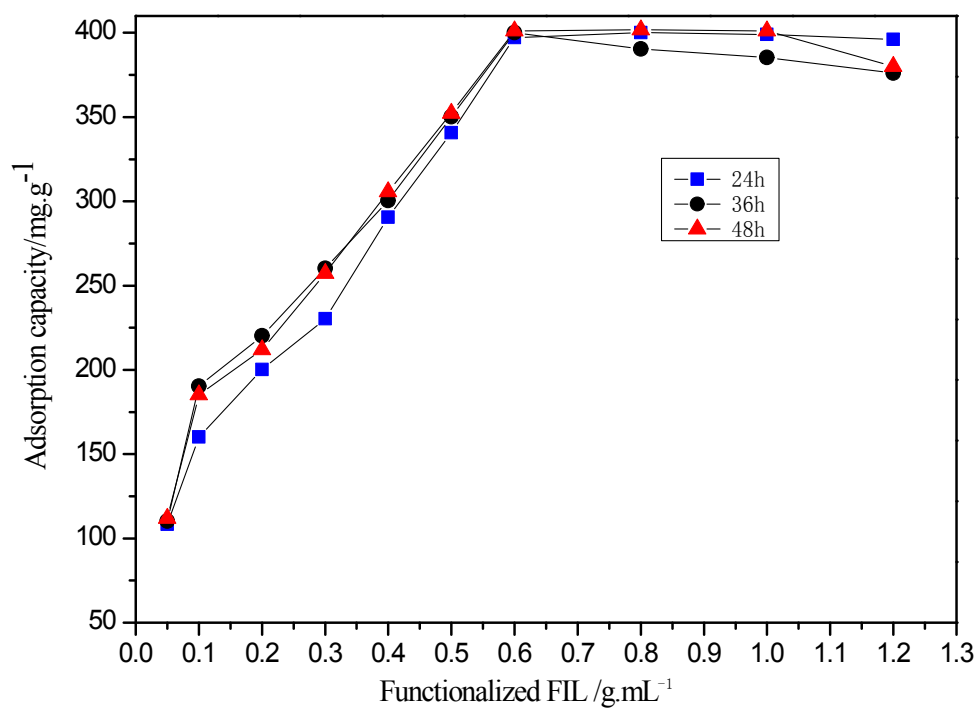

**Fig. S2** Adsorption isotherms of functionalized PIL on molecular sieve at 303 K

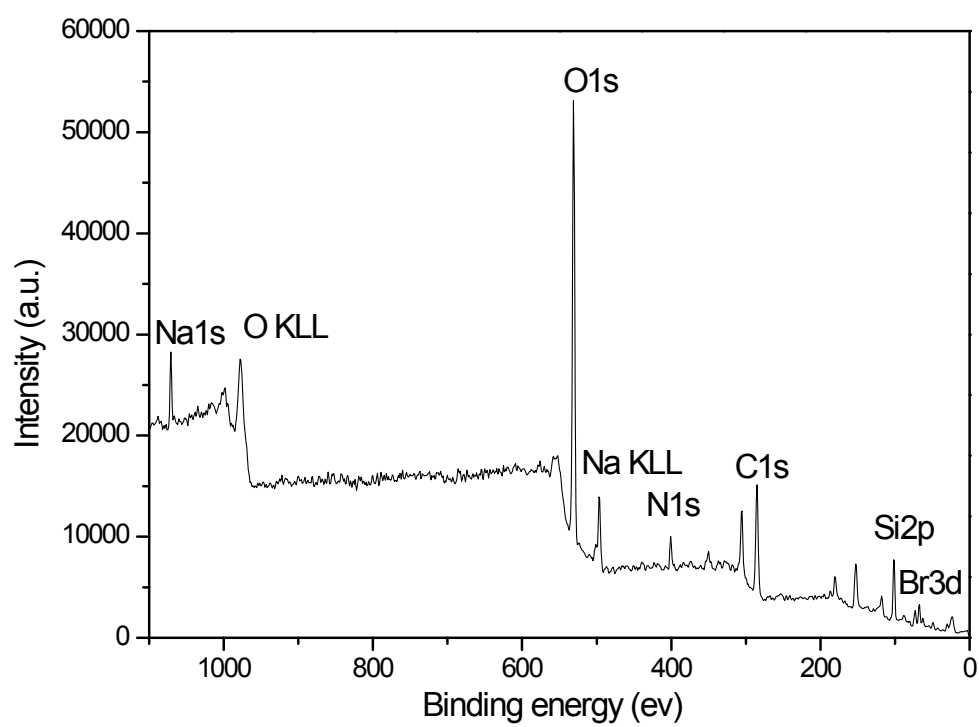

**Fig. S3** The wide survey XPS spectrum of the supported PIL catalyst
